# Supplementary material for: Enhanced electrochemical supercapacitors from metal silicates (Zn, Mn, Ni and Co) by multi-step treatment of natural green algae
Source: Royal Society of Chemistry journal article supplement (doi:10.1039/d4nj02813a), 2024-01-01
Supplement: d4nj02813a1.pdf [file d4nj02813a1.pdf]

## Supporting Information

For

### **Enhanced electrochemical supercapacitors from the metal silicates (Zn, Mn, Ni and Co) by multi-step treatment of natural green algae**

Shaoqing Zhang <sup>a,b</sup>\*, Aixue Wang <sup>a</sup>, Guozhong Zhang <sup>a</sup>, Aoqi Mei <sup>a</sup>, Tianming Lv <sup>c</sup>, Xuchun Wang <sup>a,b</sup>, Hanmei Jiang <sup>d</sup>\*

<sup>a</sup> College of chemistry and materials engineering, Anhui Science and Technology University, Bengbu 239000, China

<sup>b</sup> Anhui Province Quartz Sand Purification and Photovoltaic Glass Engineering Research Center, Anhui Science and Technology University, Bengbu 239000, China

<sup>c</sup> Instrumental Analysis Center, Dalian University of Technology, Dalian 116024, China

<sup>d</sup> Hubei Key Laboratory of Pollutant Analysis & Reuse Technology, College of Chemistry and Chemical Engineering, Hubei Normal University, Huangshi 435002, China

\* Corresponding author. E-mail address: [zhangsq@ahstu.edu.cn](mailto:zhangsq@ahstu.edu.cn) (S. Zhang);  
[20230125@hbnu.edu.cn](mailto:20230125@hbnu.edu.cn) (H. Jiang)

### ***Reagents and starting materials***

Zinc (II) acetate dihydrate ( $\text{Zn(OAc)}_2 \cdot 2\text{H}_2\text{O}$ ), manganese (II) acetate tetrahydrate ( $\text{Mn(OAc)}_2 \cdot 4\text{H}_2\text{O}$ ), nickel (II) acetate tetrahydrate ( $\text{Ni(OAc)}_2 \cdot 4\text{H}_2\text{O}$ ), cobalt (II) acetate tetrahydrate ( $\text{Co(OAc)}_2 \cdot 4\text{H}_2\text{O}$ ), hydrochloric acid aqueous solution (HCl, 36.5 wt%), sodium chloride (NaCl), sodium hydroxide (NaOH) and ethanol were purchased from Aladin Chemical Reagent Co., Ltd. and used without any further purification. Fresh green algae (GAs) were picked from a campus pond in Bengbu City, China. During this experiment, the green algae were washed with deionized (DI) water and cut into pieces, and then dried at 60 °C for 12 h.

### ***Material characterizations***

X-ray diffraction (XRD) was used to identify the compositions and structures of the products using Bruker D8 Discover X-ray diffractometer with Cu K $\alpha$  radiation (50 kV, 1000 mA). Raman spectra were recorded on a Renishaw InVia Raman microscope with a laser excitation sources of 532 nm. Fourier transform infrared spectroscopy (FTIR) spectra were collected on a Nicolet 6700 spectrometer from 4000 to 400  $\text{cm}^{-1}$  using the KBr pellet technique. X-ray photoelectron spectrum (XPS) was taken on a Thermo ESCALAB 250XiX spectrometer with monochromatized Al K $\alpha$  X-ray ( $h\nu = 1486.6$  eV). Inductively Coupled Plasma (ICP, PerkinElmer, Optima 2000DV) was adopted to analyze the content of metal elements. A linear relationship was assumed between the edge position and oxidation state. The microstructures and chemical compositions of the products were characterized by a field-emission scanning electron microscope (FE-SEM, FEI Sirion) with an Energy-dispersive X-ray spectrometer (EDS) and transmission electron microscopy (TEM, JEOL-JEM2100F). The Brunauer-Emmet-Teller (BET) surface areas of the samples were determined by a Micromeritics ASAP-2020 porosity analyzer after being degassed at 150 °C for 10 h.

### ***Electrochemical characterizations***

The working electrodes were prepared by mixing active materials, carbon black and polyvinylidenedifluoride (PVDF) together in a weight of 8:1:1. Then a small quantity of N-methyl-2-pyrrolidone (NMP) was dropwise added into the mixture to dissolve it homogeneously. The

mixed slurry was then coated onto a nickel foam with an area of  $1 \times 1 \text{ cm}^2$  and dried at  $100 \text{ }^\circ\text{C}$  for 24 h to remove organic solvent, then pressed under a pressure of 10 MPa for 10 min to obtain the working electrode. The mass loading of active materials on the nickel foam was typically 3-4 mg  $\text{cm}^{-2}$ . Electrochemical characterization was carried out in a three-electrode system in 3 M KOH aqueous solution, where Hg/HgO and carbon rod were regarded as the reference electrode and the counter electrode, respectively. The flexible solid-state asymmetric supercapacitors (HSCs) were constructed from working electrode and activated carbon (AC) electrode using a membrane filter (NKK-PF30AC) as a separator. Both of the electrodes were prepared in the same way as that used for the preparation of the working electrode in the three-electrode system. For the purpose of getting a better performance of the device, the mass ratio of the positive to negative electrode is balanced on the basis of the equal charge between cathode and anode. The electrolyte was used  $3 \text{ mol}\cdot\text{L}^{-1}$  polyvinyl alcohol/KOH (PVA/KOH) gel electrolyte. After dipping in the electrolyte, the entire device was sealed in plastic sheet to avoid the evaporation of electrolyte. The electrochemical characteristics of the ASCs devices were evaluated by galvanostatic charge-discharge (GCD), cyclic voltammetry (CV) and electrochemical impedance spectroscopy (EIS) measurements. The contribution of the nickel foam to the capacitance can be negligible [1]. The specific capacitance (C) of a single electrode was calculated on the basis of GCD according to the equation (1-2):

$$C_s = \frac{I \cdot \Delta t}{s \cdot \Delta V} \quad (1)$$

$$C = \frac{I \cdot \Delta t}{m \cdot \Delta V} \quad (2)$$

Where  $C_s$  ( $\text{mF cm}^{-2}$ ) and  $C$  ( $\text{F g}^{-1}$ ) represent areal and specific capacitance, respectively;  $I$  (A) denotes discharge current;  $\Delta t$  (s) signifies discharge time;  $s$  ( $\text{cm}^{-2}$ ) corresponds to the area of working electrode;  $m$  (g) corresponds to the mass of the active material in the working electrode, and  $\Delta V$  (V) refers to the potential window. The areal capacitance, areal capacity, energy density and power density of the ASC device were calculated on the basis of the equations (3-4):

$$E = \frac{1}{2}Cs \cdot (\Delta V)^2 \quad (3)$$

$$P = \frac{E}{\Delta t} \quad (4)$$

Where E (Wh·m<sup>-2</sup>) is the energy density and P (W·m<sup>-2</sup>) is the power density, respectively.

**Figure S1**

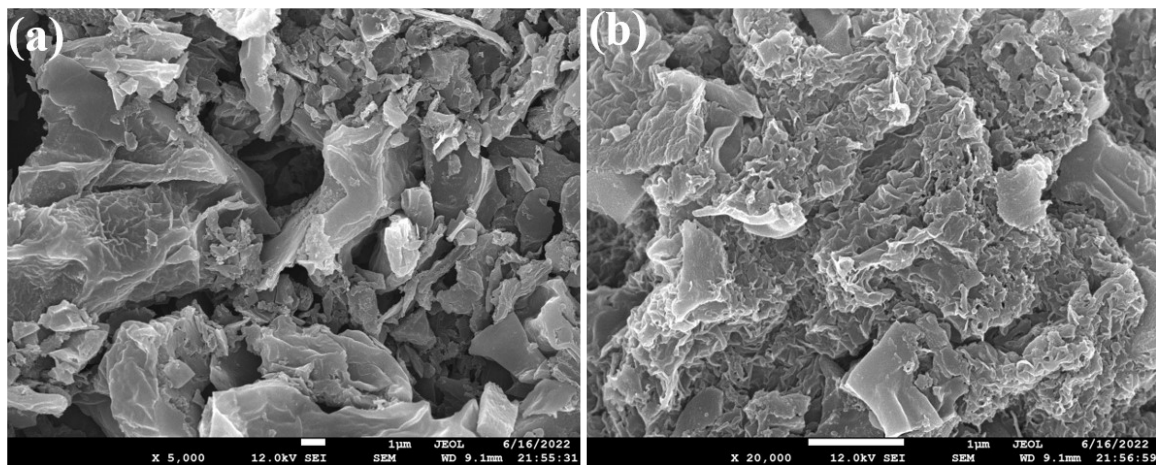

**Fig. S1.** FE-SEM images of C-SiO<sub>2</sub> from green algae.

Figure S2

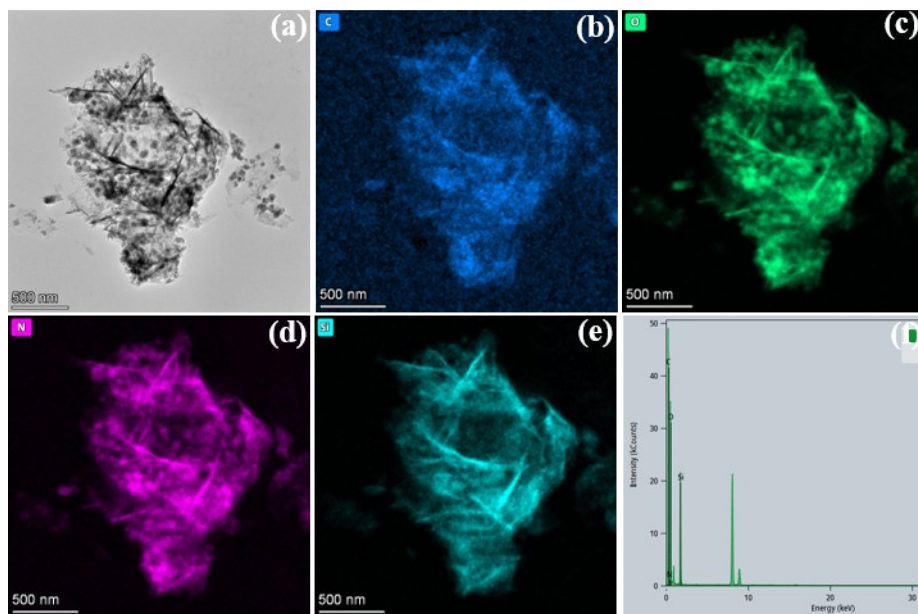

Fig. S2. TEM and Elemental mapping images of C-SiO<sub>2</sub> (a-e) and EDS layered image (f).

Figure S3

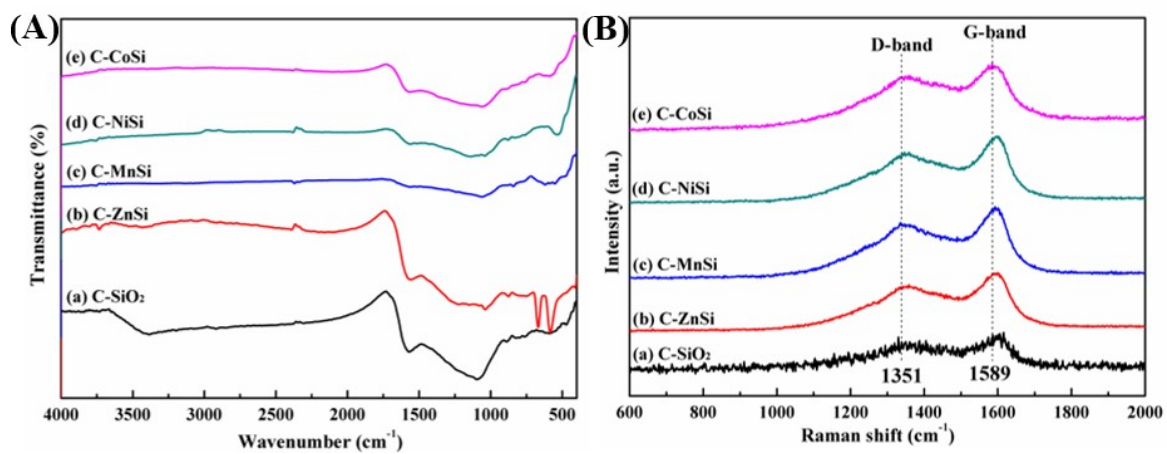

Fig. S3. (A) FT-IR spectra and (B) Raman spectra of the materials.

Figure S4

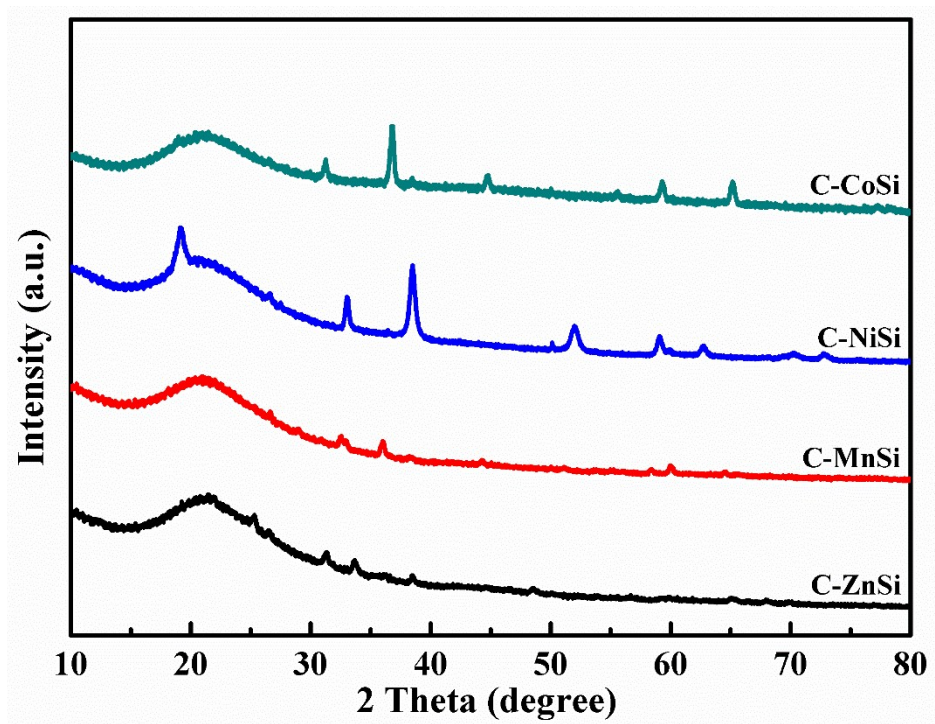

Fig. S4. XRD patterns of the synthesized C-ZnSi, C-MnSi, C-NiSi and C-CoSi.



Figure S5

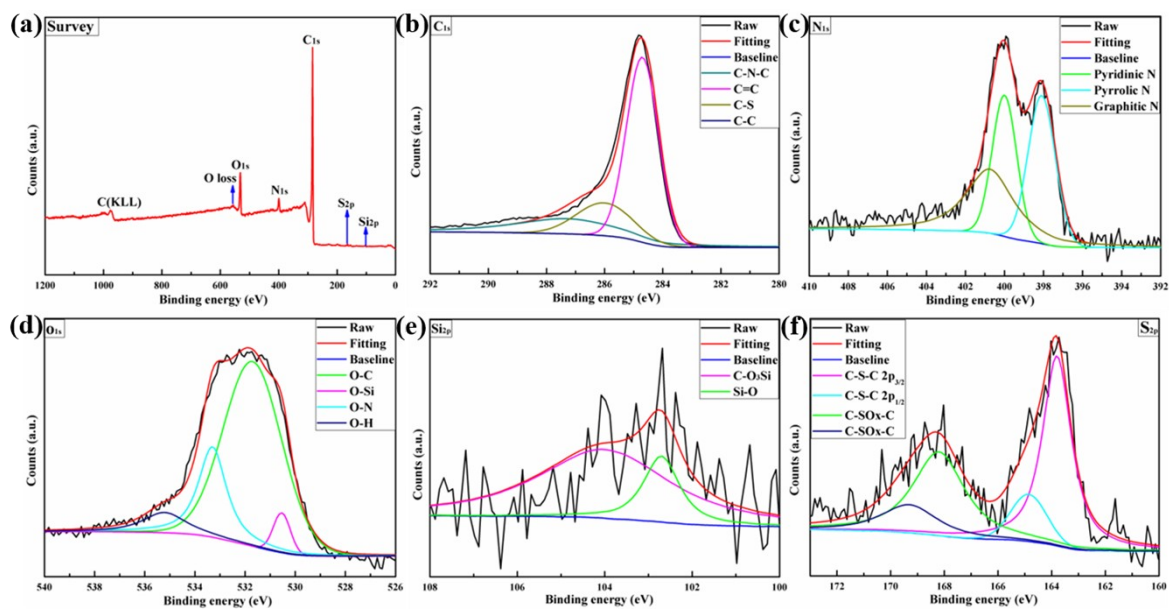

Fig. S5. XPS spectra of C-SiO<sub>2</sub>: (a) full spectrum, (b) C<sub>1s</sub>, (c) N<sub>1s</sub>, (d) O<sub>2p</sub>, (e) Si<sub>2p</sub> and (f) S<sub>2p</sub>.



Figure S7

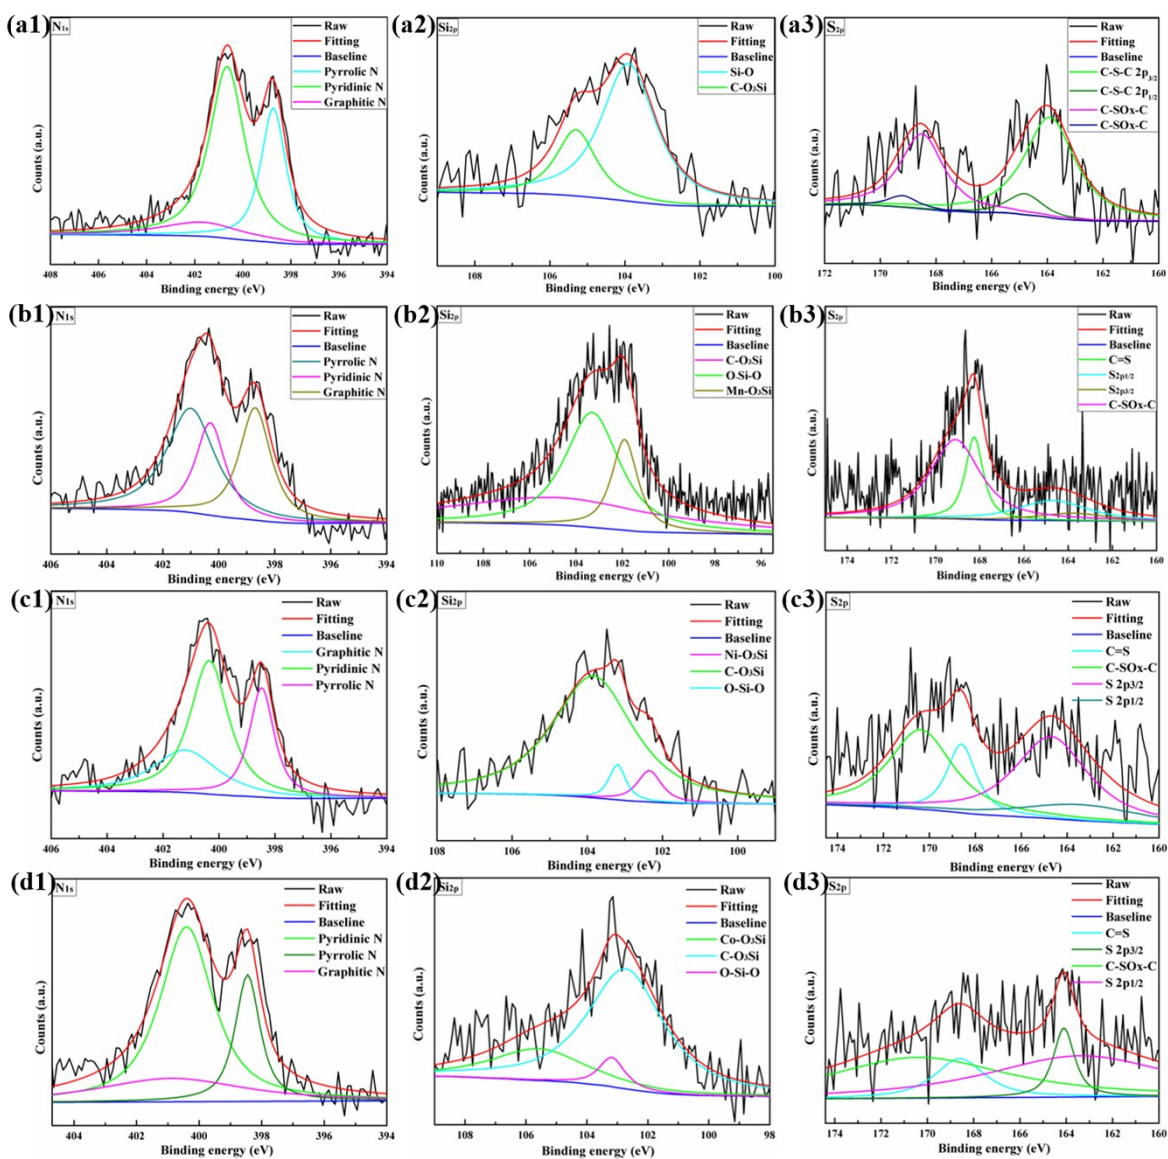

Fig. S7. XPS spectra of m-C-MSi: (a1-d1)  $N_{1s}$ , (a2-d2)  $Si_{2p}$  and (a3-d3)  $S_{2p}$  ( $M = Zn, Mn, Ni$  and  $Co$ ).

**Figure S8**

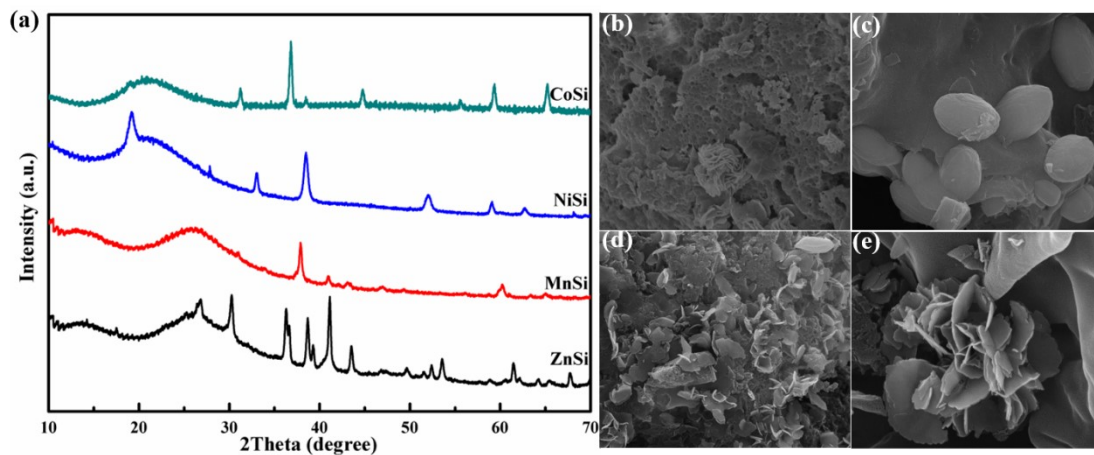

**Fig. S8.** (a) XRD patterns of the synthesized ZnSi, MnSi, NiSi and CoSi; FE-SEM images of ZnSi (b), MnSi (c), NiSi (d) and CoSi (e).

SiO<sub>2</sub> was used as the silicon source to synthesize the metal silicates and named as ZnSi, MnSi, NiSi and CoSi, respectively. The XRD patterns and FE-SEM images are shown in Fig. S8. Compared to the m-C-MSi materials, the crystallinity of these materials has been enhanced, and there is no significant change in morphology.

Figure S9

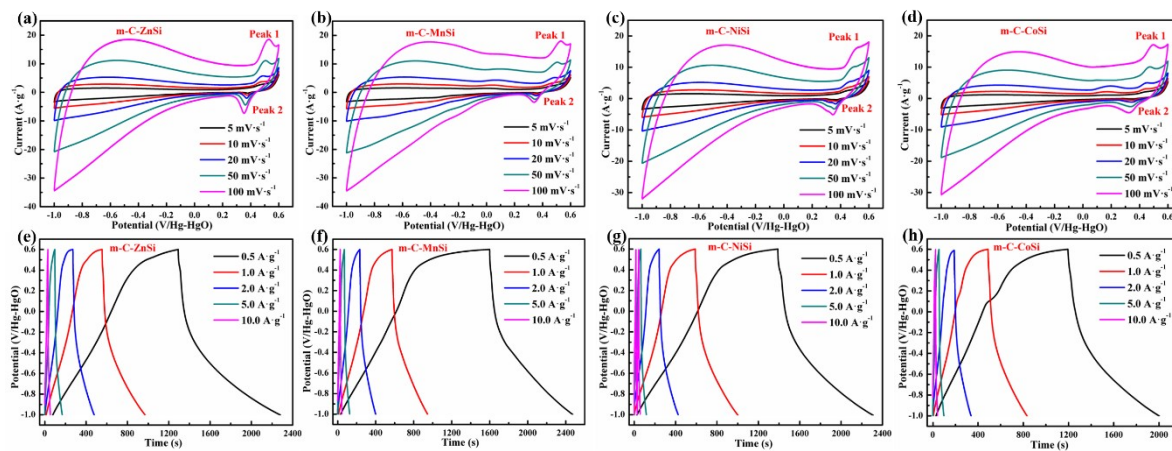

Fig. S9. (a-d) CV curves of m-C-MSi at different scan rates from 5 mV s<sup>-1</sup> to 100 mV s<sup>-1</sup>; (e-h) GCD curves of C-MSi at different current densities from 0.5 A g<sup>-1</sup> to 10.0 A g<sup>-1</sup> (M = Zn, Mn, Ni, Co).

Figure S10

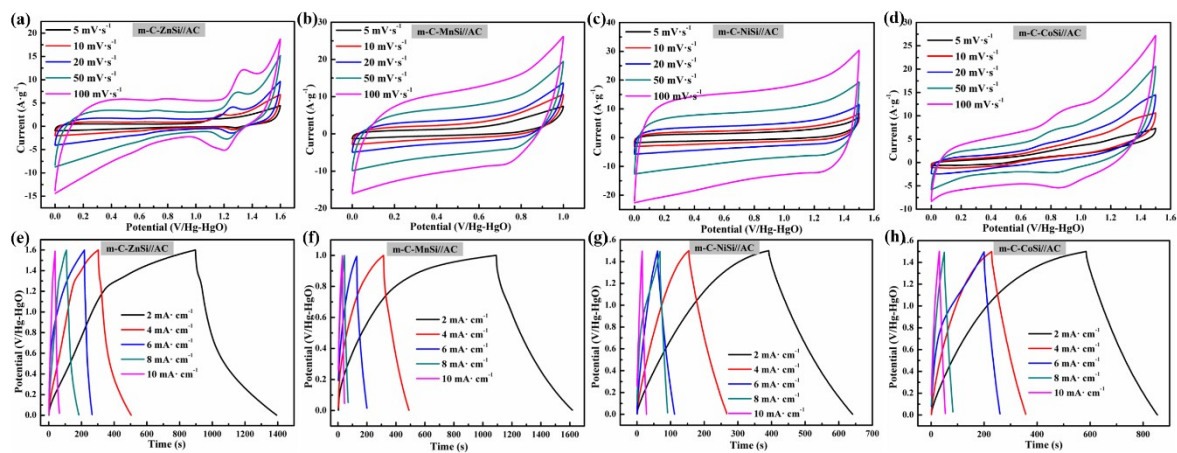

Fig. S10. (a-d) CV curves of m-C-MSi//AC at different scan rates from 5 mV s<sup>-1</sup> to 100 mV s<sup>-1</sup>; (e-h) GCD curves of m-C-MSi-3//AC at different current densities 2 mA cm<sup>-2</sup> to 10.0 mA cm<sup>-2</sup> (M = Zn, Mn, Ni, Co).



Figure S11

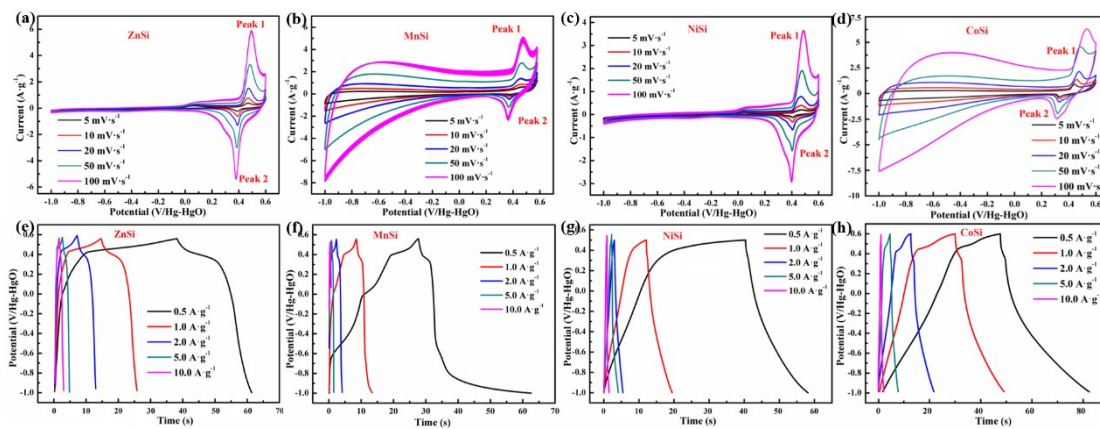

**Fig. S11.** (a-d) CV curves of MSi at different scan rates from  $5 \text{ mV s}^{-1}$  to  $100 \text{ mV s}^{-1}$ ; (e-h) GCD curves of MSi at different current densities from  $0.5 \text{ A g}^{-1}$  to  $10.0 \text{ A g}^{-1}$  ( $M = \text{Zn, Mn, Ni, Co}$ ).

For comparison, the CV curves and GCD curves tests of MSi ( $M = \text{Zn, Mn, Ni}$  and  $\text{Co}$ ) shown in Fig. S11 present similar potential range and shape with very lower electrochemical performance.

**Table S1**

Table S1. Pore Parameters of m-C-MSi (M = Zn, Mn, Ni and Co).

| sample   | BET surface area (m <sup>2</sup> g <sup>-1</sup> ) | total pore vol (cm <sup>3</sup> g <sup>-1</sup> ) | Average pore diameter (nm) |
|----------|----------------------------------------------------|---------------------------------------------------|----------------------------|
| m-C-ZnSi | 604                                                | 0.596                                             | 4.09                       |
| m-C-MnSi | 617                                                | 0.588                                             | 5.67                       |
| m-C-NiSi | 599                                                | 0.581                                             | 4.03                       |
| m-C-CoSi | 581                                                | 0.562                                             | 3.91                       |



**Table S2**

Table S2. Comparison of the electrochemical performance of m-C-ZnSi, m-C-MnSi, m-C-NiSi and m-C-CoSi with the reported silicate-based materials.

| Si- or Zn-based materials                                                          | Electrolyte <sup>a</sup>              | Potential/V       | Capacitance/mF cm <sup>-2</sup>                   | Cycling capability        | Reference        |
|------------------------------------------------------------------------------------|---------------------------------------|-------------------|---------------------------------------------------|---------------------------|------------------|
| Ni <sub>3</sub> Si <sub>2</sub> O <sub>5</sub> (OH) <sub>4</sub> /RGO              | 2 M KOH                               | 0.2 ~ 0.6         | 178.9 F g <sup>-1</sup> , 1 A g <sup>-1</sup>     | 97.6 % after 5000         | [2]              |
| MnSiO <sub>3</sub>                                                                 | 6 M KOH                               | 0.2 ~ 0.6         | 251 F g <sup>-1</sup> , 0.6 A g <sup>-1</sup>     | —                         | [3]              |
| Manganese silicate drapes                                                          | 1 M KOH                               | -0.5 ~ 0.4        | 283 F g <sup>-1</sup> , 0.5 A g <sup>-1</sup>     | 74.7 % after 1000         | [4]              |
| (Ni, Co) <sub>3</sub> Si <sub>2</sub> O <sub>5</sub> (OH) <sub>4</sub>             | 1 M KOH                               | 0 ~ 0.5           | 144 F g <sup>-1</sup> , 1 A g <sup>-1</sup>       | 99.3 % after 10000        | [5]              |
| Mesoporous-Li <sub>2</sub> MnSiO <sub>4</sub>                                      | 2 M KOH                               | 0 ~ 0.55          | 120 F g <sup>-1</sup> , 20 mV s <sup>-1</sup>     | 85.7 % after 500          | [6]              |
| Ni <sub>3</sub> Si <sub>2</sub> O <sub>5</sub> (OH) <sub>4</sub>                   | 3 M KOH                               | 0 ~ 0.5           | 132.4 F g <sup>-1</sup> , 0.5 A g <sup>-1</sup>   | 100 % after 10000         | [7]              |
| Co <sub>3</sub> (Si <sub>2</sub> O <sub>5</sub> ) <sub>2</sub> (OH) <sub>2</sub>   | 6 M KOH                               | 0.1 ~ 0.55        | 237 F g <sup>-1</sup> , 5.7 mA cm <sup>-2</sup>   | 95 % after 150            | [8]              |
| Co <sub>3</sub> Si <sub>2</sub> O <sub>5</sub> (OH) <sub>4</sub>                   | 6 M KOH                               | 0 ~ 0.5           | 570 F g <sup>-1</sup> , 0.7 A g <sup>-1</sup>     | —                         | [9]              |
| MnSiO <sub>3</sub> /GO                                                             | 1 M Na <sub>2</sub> SO <sub>4</sub>   | -0.2 ~ 1          | 262.5 F g <sup>-1</sup> , 0.5 A g <sup>-1</sup>   | 53 % after 5000           | [10]             |
| Co <sub>x</sub> Ni <sub>3-x</sub> Si <sub>2</sub> O <sub>5</sub> (OH) <sub>4</sub> | 3 M KOH                               | -0.80 ~ 0.6       | 226 F g <sup>-1</sup> , 0.5 A g <sup>-1</sup>     | 99 % after 10000          | [11]             |
| MnO <sub>2</sub> /carbon cloth                                                     | 0.1 M Na <sub>2</sub> SO <sub>4</sub> | 0 ~ 0.8           | 230 mF cm <sup>-2</sup> , 10 mV s <sup>-1</sup>   | 98.5 % after 3000         | [12]             |
| CoSi hollow sphere                                                                 | 3 M KOH                               | 0 ~ 0.5           | 452.8 F g <sup>-1</sup> , 0.5 A g <sup>-1</sup>   | 89 % after 10000          | [13]             |
| SWCNT/cellulose/PANI                                                               | 1 M H <sub>2</sub> SO <sub>4</sub>    | -0.2 ~ 0.6        | 330 mF cm <sup>-2</sup> , 0.2 mA cm <sup>-2</sup> | 79% after 1000            | [14]             |
| Zn <sub>4</sub> Si <sub>2</sub> O <sub>7</sub> (OH) <sub>2</sub> ·H <sub>2</sub> O | 3 M KOH                               | -1.0 ~ 0.6        | 341 mF cm <sup>-2</sup> , 5 mV s <sup>-1</sup>    | 99 % after 10000          | [15]             |
| Co <sub>2</sub> Si <sub>2</sub> O <sub>4</sub>                                     | 6 M KOH                               | 0 ~ 0.5           | 267 mF cm <sup>-2</sup> , 5 mV s <sup>-1</sup>    | 90 % after 10000          | [16]             |
| e-NiSi-3                                                                           | 6 M KOH                               | 0 ~ 0.5           | 272 F g <sup>-1</sup> , 1 A g <sup>-1</sup>       | 96% after 10000           | [17]             |
| e-MnSi-3                                                                           | 6 M KOH                               | 0 ~ 0.5           | 439 F g <sup>-1</sup> , 1 A g <sup>-1</sup>       | 80% after 10000           | [17]             |
| C-ZnSi-4                                                                           | 3 M KOH                               | -1.0 ~ 0.6        | 479 F g <sup>-1</sup> , 0.5 A g <sup>-1</sup>     | 84 % after 10000          | [18]             |
| C-MnSi-4                                                                           | 3 M KOH                               | -1.0 ~ 0.6        | 529 F g <sup>-1</sup> , 0.5 A g <sup>-1</sup>     | 86 % after 10000          | [18]             |
| e-C-ZnSi-4                                                                         | 3 M KOH                               | -1.0 ~ 0.6        | 527 F g <sup>-1</sup> , 0.5 A g <sup>-1</sup>     | 99 % after 10000          | [18]             |
| e-C-MnSi-4                                                                         | 3 M KOH                               | -1.0 ~ 0.6        | 571 F g <sup>-1</sup> , 0.5 A g <sup>-1</sup>     | 98 % after 10000          | [18]             |
| C-NiSi-3                                                                           | 3 M KOH                               | -1.0 ~ 0.6        | 401 F g <sup>-1</sup> , 0.5 A g <sup>-1</sup>     | 87 % after 10000          | [19]             |
| C-CoSi-3                                                                           | 3 M KOH                               | -1.0 ~ 0.6        | 373 F g <sup>-1</sup> , 0.5 A g <sup>-1</sup>     | 84 % after 10000          | [19]             |
| e-C-NiSi-3                                                                         | 3 M KOH                               | -1.0 ~ 0.6        | 439 F g <sup>-1</sup> , 0.5 A g <sup>-1</sup>     | 94 % after 10000          | [19]             |
| e-C-CoSi-3                                                                         | 3 M KOH                               | -1.0 ~ 0.6        | 402 F g <sup>-1</sup> , 0.5 A g <sup>-1</sup>     | 90 % after 10000          | [19]             |
| <b>m-C-ZnSi</b>                                                                    | <b>3 M KOH</b>                        | <b>-1.0 ~ 0.6</b> | <b>548 F g<sup>-1</sup>, 0.5 A g<sup>-1</sup></b> | <b>99.4 % after 10000</b> | <b>This work</b> |
| <b>m-C-MnSi</b>                                                                    | <b>3 M KOH</b>                        | <b>-1.0 ~ 0.6</b> | <b>590 F g<sup>-1</sup>, 0.5 A g<sup>-1</sup></b> | <b>99.1 % after 10000</b> | <b>This work</b> |
| <b>m-C-NiSi</b>                                                                    | <b>3 M KOH</b>                        | <b>-1.0 ~ 0.6</b> | <b>487 F g<sup>-1</sup>, 0.5 A g<sup>-1</sup></b> | <b>99.6 % after 10000</b> | <b>This work</b> |
| <b>m-C-CoSi</b>                                                                    | <b>3 M KOH</b>                        | <b>-1.0 ~ 0.6</b> | <b>453 F g<sup>-1</sup>, 0.5 A g<sup>-1</sup></b> | <b>99.3 % after 10000</b> | <b>This work</b> |

a

M

=

mol

L<sup>-1</sup>

**Table S3**

Table S3. Comparison of the electrochemical performance of the devices based on silicate-based materials.

| Various devices                                                             | Electrolyte    | Potential    | Capacitance                                         | Cycling capability       | Energy density                | Reference        |
|-----------------------------------------------------------------------------|----------------|--------------|-----------------------------------------------------|--------------------------|-------------------------------|------------------|
| C-ZnSi//AC ASC                                                              | PVA/KOH        | 2 V          | 194 mF cm <sup>-2</sup> , 2 mA cm <sup>-2</sup>     | 80% after 6900           | 0.690 Wh m <sup>-2</sup>      | [14]             |
| CoNiSi/C//Ni(OH) <sub>2</sub> ASC                                           | PVA/KOH        | 1.6 V        | 254 mF cm <sup>-2</sup> , 2 mA cm <sup>-2</sup>     | 82% after 10000          | 0.793 Wh m <sup>-2</sup>      | [4]              |
| MnSi-C//Ni(OH) <sub>2</sub> ASC                                             | PVA/KOH        | 2 V          | 439 mF cm <sup>-2</sup> , 4 mA cm <sup>-2</sup>     | 34% after 1000           | 5.3 mWh cm <sup>-3</sup>      | [2]              |
| C-NiSi//Ni(OH) <sub>2</sub> ASC                                             | PVA/KOH        | 1.8 V        | 694 mF cm <sup>-2</sup> , 4 mA cm <sup>-2</sup>     | 56% after 3000           | 6.78 mWh cm <sup>-3</sup>     | [6]              |
| C/Co <sub>3</sub> Si <sub>2</sub> O <sub>5</sub> (OH) <sub>4</sub> //AC ASC | PVA/KOH        | 1.5 V        | 352 mF cm <sup>-2</sup> , 1 mA cm <sup>-2</sup>     | 97.2% after 6000         | 8.5 mWh cm <sup>-3</sup>      | [8]              |
| NiSi//AC HSC                                                                | PVA/KOH        | 1.5 V        | 207 mF cm <sup>-2</sup> , 4 mA cm <sup>-2</sup>     | 79% after 5000           | 1.62 Wh m <sup>-2</sup>       | [16]             |
| CoSi//AC HSC                                                                | PVA/KOH        | 1.5 V        | 135 mF cm <sup>-2</sup> , 4 mA cm <sup>-2</sup>     | 76% after 5000           | 1.05 Wh m <sup>-2</sup>       | [16]             |
| MnSi//AC HSC                                                                | PVA/KOH        | 1.5 V        | 226 mF cm <sup>-2</sup> , 4 mA cm <sup>-2</sup>     | 58 % after 5000          | 1.77 Wh m <sup>-2</sup>       | [16]             |
| C-ZnSi-4//AC HSC                                                            | PVA/KOH        | 1.6 V        | 576 mF cm <sup>-2</sup> , 2 mA cm <sup>-2</sup>     | 69.0 % after 5000        | 3.74 Wh m <sup>-2</sup>       | [18]             |
| C-MnSi-4//AC HSC                                                            | PVA/KOH        | 1.0 V        | 557 mF cm <sup>-2</sup> , 2 mA cm <sup>-2</sup>     | 68.3 % after 5000        | 3.88 Wh m <sup>-2</sup>       | [18]             |
| e-C-ZnSi-4//AC HSC                                                          | PVA/KOH        | 1.6 V        | 645 mF cm <sup>-2</sup> , 2 mA cm <sup>-2</sup>     | 75.3 % after 5000        | 4.80 Wh m <sup>-2</sup>       | [18]             |
| e-C-MnSi-4//AC HSC                                                          | PVA/KOH        | 1.0 V        | 623 mF cm <sup>-2</sup> , 2 mA cm <sup>-2</sup>     | 76.4 % after 5000        | 4.41 Wh m <sup>-2</sup>       | [18]             |
| C-NiSi-3//AC HSC                                                            | PVA/KOH        | 1.5 V        | 409 mF cm <sup>-2</sup> , 2 mA cm <sup>-2</sup>     | 83 % after 5000          | 2.44 Wh m <sup>-2</sup>       | [19]             |
| C-CoSi-3//AC HSC                                                            | PVA/KOH        | 1.5 V        | 376 mF cm <sup>-2</sup> , 2 mA cm <sup>-2</sup>     | 79 % after 5000          | 2.01 Wh m <sup>-2</sup>       | [19]             |
| e-C-NiSi-3//AC HSC                                                          | PVA/KOH        | 1.5 V        | 444 mF cm <sup>-2</sup> , 2 mA cm <sup>-2</sup>     | 87 % after 5000          | 3.71 Wh m <sup>-2</sup>       | [19]             |
| e-C-CoSi-3//AC HSC                                                          | PVA/KOH        | 1.5 V        | 407 mF cm <sup>-2</sup> , 2 mA cm <sup>-2</sup>     | 84 % after 5000          | 2.59 Wh m <sup>-2</sup>       | [19]             |
| <b>m-C-ZnSi//AC HSC</b>                                                     | <b>PVA/KOH</b> | <b>1.6 V</b> | <b>681 mF cm<sup>-2</sup>, 2 mA cm<sup>-2</sup></b> | <b>83.4 % after 6000</b> | <b>5.06 Wh m<sup>-2</sup></b> | <b>This work</b> |
| <b>m-C-MnSi//AC HSC</b>                                                     | <b>PVA/KOH</b> | <b>1.0 V</b> | <b>648 mF cm<sup>-2</sup>, 2 mA cm<sup>-2</sup></b> | <b>85.0 % after 6000</b> | <b>4.80 Wh m<sup>-2</sup></b> | <b>This work</b> |
| <b>m-C-NiSi//AC HSC</b>                                                     | <b>PVA/KOH</b> | <b>1.5 V</b> | <b>512 mF cm<sup>-2</sup>, 2 mA cm<sup>-2</sup></b> | <b>85.4 % after 5000</b> | <b>4.38 Wh m<sup>-2</sup></b> | <b>This work</b> |
| <b>mC-CoSi//AC HSC</b>                                                      | <b>PVA/KOH</b> | <b>1.5 V</b> | <b>497 mF cm<sup>-2</sup>, 2 mA cm<sup>-2</sup></b> | <b>81.8 % after 5000</b> | <b>4.05 Wh m<sup>-2</sup></b> | <b>This work</b> |

ASC = Asymmetric Supercapacitor; PVA = Polyvinyl Alcohol

## References

- [1] J. Zheng, Y. Zhang, Q. Wang, H. Jiang, Y. Liu, T. Lv, C. Meng, Hydrothermal encapsulation of VO<sub>2</sub>(A) nanorods in amorphous carbon by carbonization of glucose for energy storage devices, *Dalton Trans* 47 (2018) 452-464.
- [2] Y. Zhang, W. Zhou, H. Yu, T. Feng, Y. Pu, H. Liu, W. Xiao, L. Tian, Self-templated synthesis of nickel silicate hydroxide/reduced graphene oxide composite hollow microspheres as highly stable supercapacitor electrode material, *Nanoscale Research Letters* 12 (2017) 325.
- [3] T. Chen, Z. Shifeng, L. Qingshan, Self-templated synthesis of mesoporous manganese silicates as an electrode material for supercapacitor, *Ceramics International* 44 (2018) 17007-17012.
- [4] H. Wang, Y. Wang, X. Bai, H. Yang, J. Han, N. Lun, Y. Qi, Y. Bai, Manganese silicate drapes as a novel electrode material for supercapacitors, *RSC Advances* 6 (2016) 105771-105779.
- [5] Q. Rong, L. Long, X. Zhang, Y. Huang, H. Yu, Layered cobalt nickel silicate hollow spheres as a highly-stable supercapacitor material, *Applied Energy* 153 (2015) 63-69.
- [6] P. Chaturvedi, A. Kumar, A. Sil, Y. Sharma, Cost effective urea combustion derived mesoporous-Li<sub>2</sub>MnSiO<sub>4</sub> as a novel material for supercapacitors, *RSC Advances* 5 (2015) 25156-25163.
- [7] Q. Wang, Y. Zhang, H. Jiang, T. Hu, C. Meng, In situ generated Ni<sub>3</sub>Si<sub>2</sub>O<sub>5</sub>(OH)<sub>4</sub> on mesoporous heteroatom-enriched carbon derived from natural bamboo leaves for high-performance supercapacitors, *ACS Applied Energy Materials* 1 (2018) 3396-3409.
- [8] G. Zhang, Y. Zhao, F. Tao, H. Li, Electrochemical characteristics and impedance spectroscopy studies of nano-cobalt silicate hydroxide for supercapacitor, *Journal of Power Sources* 161 (2006) 723-729.
- [9] J. Zhao, Y. Zhang, T. Wang, P. Li, C. Wei, H. Pang, Reed leaves as a sustainable silica source for 3D mesoporous nickel (cobalt) silicate architectures assembled into ultrathin nanoflakes for high-performance supercapacitors, *Advanced Materials Interfaces* 2 (2015) 1400377.
- [10] Y. Cheng, Y. Zhang, Q. Wang, C. Meng, Synthesis of amorphous MnSiO<sub>3</sub>/graphene oxide with excellent electrochemical performance as supercapacitor electrode, *Colloids and Surfaces A Physicochemical and Engineering Aspects* 562 (2018) 93-100.
- [11] Y. Zhang, C. Wang, H. Jiang, Q. Wang, J. Zheng, Cobalt-nickel silicate hydroxide on amorphous carbon derived from bamboo leaves for hybrid supercapacitors, *Chemical Engineering Journal* 375 (2019) 121938-121938.
- [12] Y. Chen, Y. Hsu, Y. Lin, Y. Lin, Y. Horng, L. Chen, K. Chen, Highly flexible supercapacitors with manganese oxide nanosheet/carbon cloth electrode, *Electrochimica Acta* 56 (2011) 7124-7130.
- [13] Q. Wang, Y. Zhang, H. Jiang, X. Li, Y. Cheng, G. Meng, Designed mesoporous hollow sphere architecture metal (Mn, Co, Ni) silicate: A potential electrode material for flexible all solid-state asymmetric supercapacitor, *Chemical Engineering Journal* 362 (2019) 818-829.
- [14] D. Ge, L. Yang, L. Fan, C. Zhang, X. Xiao, Y. Gogotsi, S. Yang, Foldable supercapacitors from triple networks of macroporous cellulose fibers, single-walled carbon nanotubes and polyaniline nanoribbons, *Nano Energy* 11 (2015) 568-578.
- [15] S. Zhang, Y. Liu, J. Zheng, Y. Mu, C. Meng, Rice-like and rose-like zinc silicates anchored on amorphous carbon derived from natural reed leaves for high-performance supercapacitors, *Dalton Transactions* 50 (2021) 9438-9449.
- [16] Y. Zhang, C. Wang, H. Jiang, Q. Wang, J. Zheng, C. Meng, Cobalt-nickel silicate hydroxide on amorphous carbon derived from bamboo leaves for hybrid supercapacitors, *Chemical Engineering Journal*

375 (2019) 121938-121938.

[17] Y. Zhang, C. Wang, X. Dong, H. Jiang, C. Huang, Alkali etching metal silicates derived from bamboo leaves with enhanced electrochemical properties for solid-state hybrid supercapacitors, *Chemical Engineering Journal* 417 (2020) 127964-127976.

[18] S. Zhang, J. Zheng, J. Meng, Y. Zhang, F. Niu, Y. Wang, H. Yan, Z. Li, C. Meng, Alkali etching zinc and manganese silicates derived from natural green algae for supercapacitors with enhanced electrochemical properties, *Journal of Colloid and Interface Science* 623 (2022) 135-145.

[19] S. Zhang, H. Yan, Y. Wang, F. Niu, T. Guo, Y. Zhang, Z. Li, X. Chun, C. Meng, Butterfly-like metal-silicates derived from natural green algae for supercapacitors with enhanced electrochemical properties by alkali etching, *Journal of Analytical and Applied Pyrolysis*, 167 (2022) 105687.
